# Supplementary material for: Insight into oxygen diffusion mechanism in ionomer film on catalyst surface with varying perfluorosulfonic acid and water contents
Source: Royal Society of Chemistry journal article supplement (doi:10.1039/d3ta07822a), 2024-01-01
Supplement: d3ta07822a1.pdf [file d3ta07822a1.pdf]

## Supplementary Information

### Insight into oxygen diffusion mechanism in ionomer film on catalyst surface with varying perfluorosulfonic acid and water contents

*Jiabin You<sup>a</sup>, Huiyuan Li<sup>a</sup>, Yong Feng,<sup>b,c</sup> Xiaojing Cheng<sup>a</sup>, Liuxuan Luo<sup>a</sup>, Daihui Yang<sup>b</sup>, Guanghua Wei<sup>d</sup>, Shuiyun Shen<sup>a</sup>, Xiaohui Yan<sup>a,\*</sup>, and Junliang Zhang<sup>a,e,\*</sup>*

*<sup>a</sup> Institute of Fuel Cells, School of Mechanical Engineering, Shanghai Jiao Tong University, Shanghai 200240, China.*

*<sup>b</sup> State Key Laboratory of Advanced Chemical Power Sources, Guizhou Meiling Power Sources Co. Ltd., Zunyi 563003, China*

*<sup>c</sup> School of Chemistry and Chemical Engineering, Chongqing University, Chongqing 400044, China*

*<sup>d</sup> SJTU-Paris Tech Elite Institute of Technology, Shanghai Jiao Tong University, Shanghai 200240, China*

*<sup>e</sup> MOE Key Laboratory of Power & Machinery Engineering, Shanghai Jiao Tong University, Shanghai 200240, China*

E-mail address: [yanxiaohui@sjtu.edu.cn](mailto:yanxiaohui@sjtu.edu.cn) (X, Yan), [junliang.zhang@sjtu.edu.cn](mailto:junliang.zhang@sjtu.edu.cn)

(J, Zhang).

## Model validation

In classic molecular dynamics (MD) simulations focusing on the hydrated Nafion systems of proton exchange membrane fuel cells (PEMFCs), the models are commonly validated by examining the density of bulk Nafion and the diffusion coefficients of water molecules. Accordingly, we built the bulk Nafion models by using the potential parameters from the modified DREIDING force fields.<sup>1, 2</sup> As shown in Fig. S1, the simulated results including the density of bulk Nafion and diffusion coefficients of water molecules are in agreement with the previous results,<sup>1, 3-7</sup> thus providing validation for the accuracy of the applied potential parameters and MD models. Furthermore, the modified DREIDING force fields are widely utilized in the field of PEMFCs.<sup>8-15</sup> All of these indicate that the simulation results presented in this study are reliable.

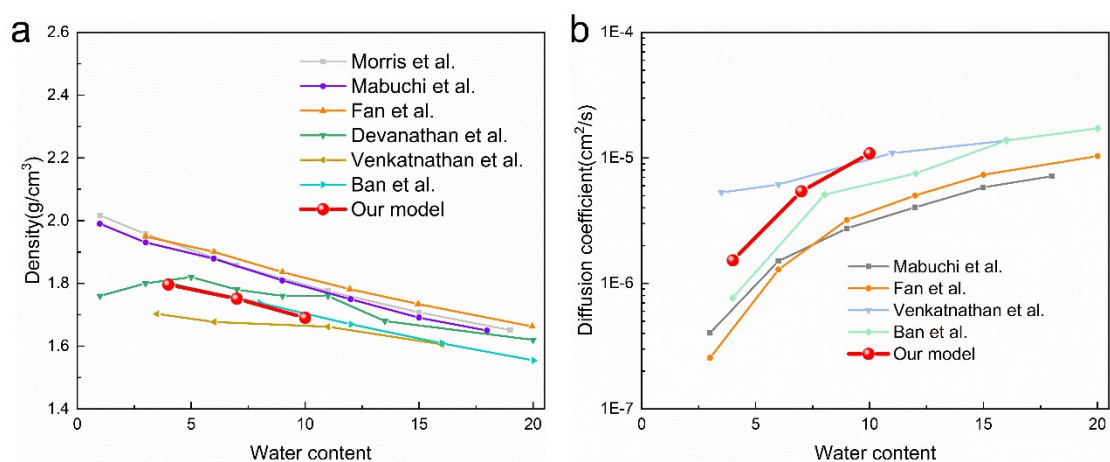

**Fig. S1.** Simulated (a) density of bulk Nafion and (b) diffusion coefficients of water molecules.<sup>2</sup>

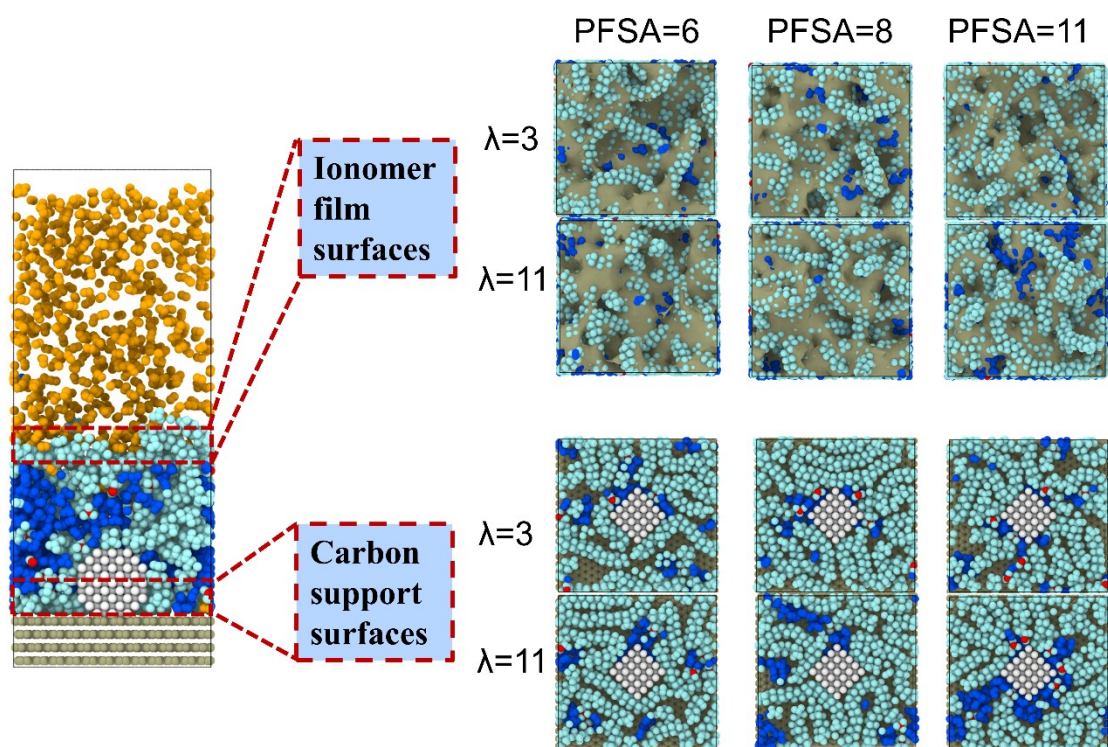

**Fig. S2.** Snapshots of surface regions and dense layers.

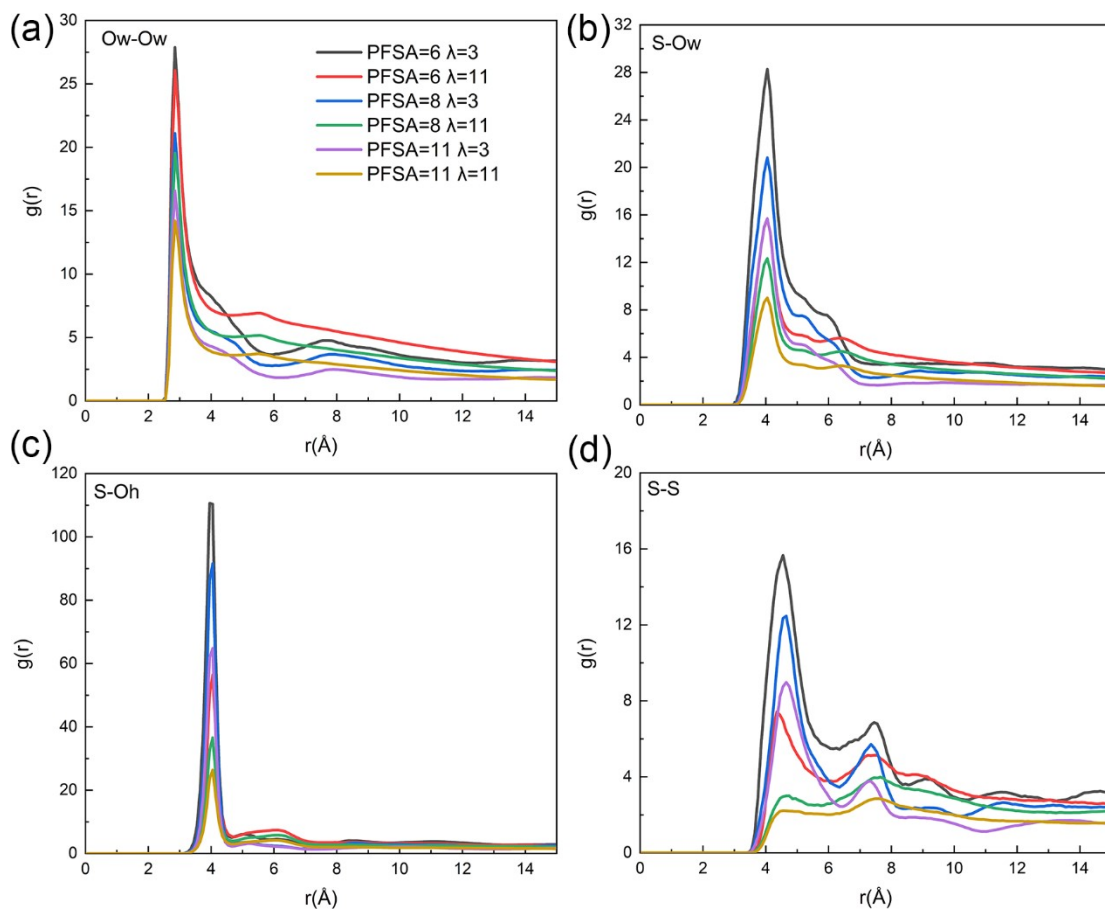

**Fig. S3.** The RDFs of (a)Ow-Ow (oxygen atoms of water molecules), (b)S-Ow, (c)S-Oh (oxygen atoms of hydronium ions), (d)S-S (sulfur atoms of sulfonic groups).

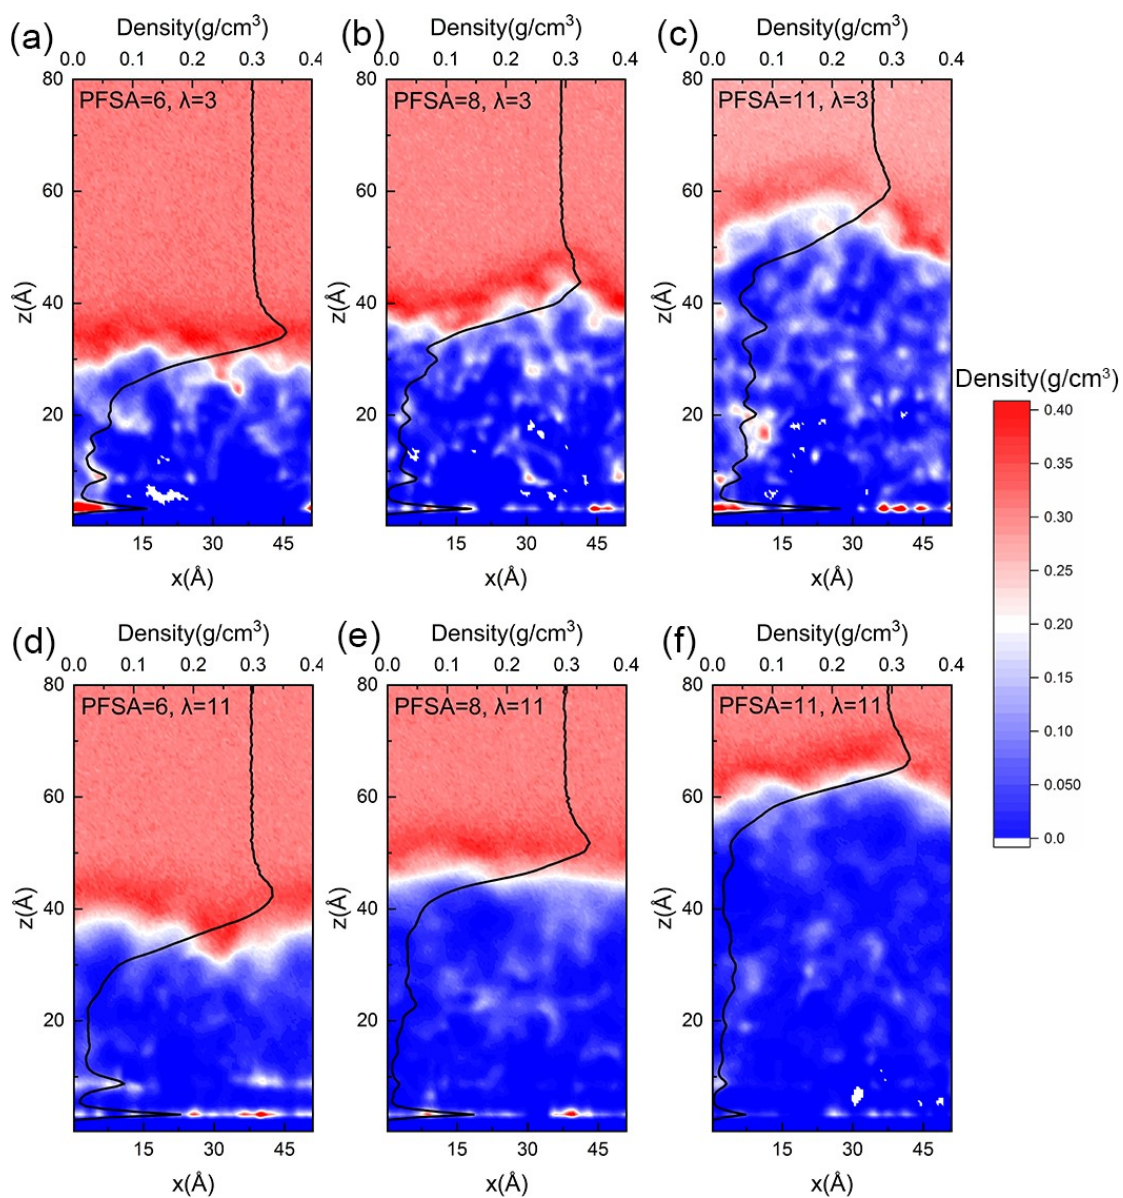

**Fig. S4.** The density distributions of oxygen molecules.

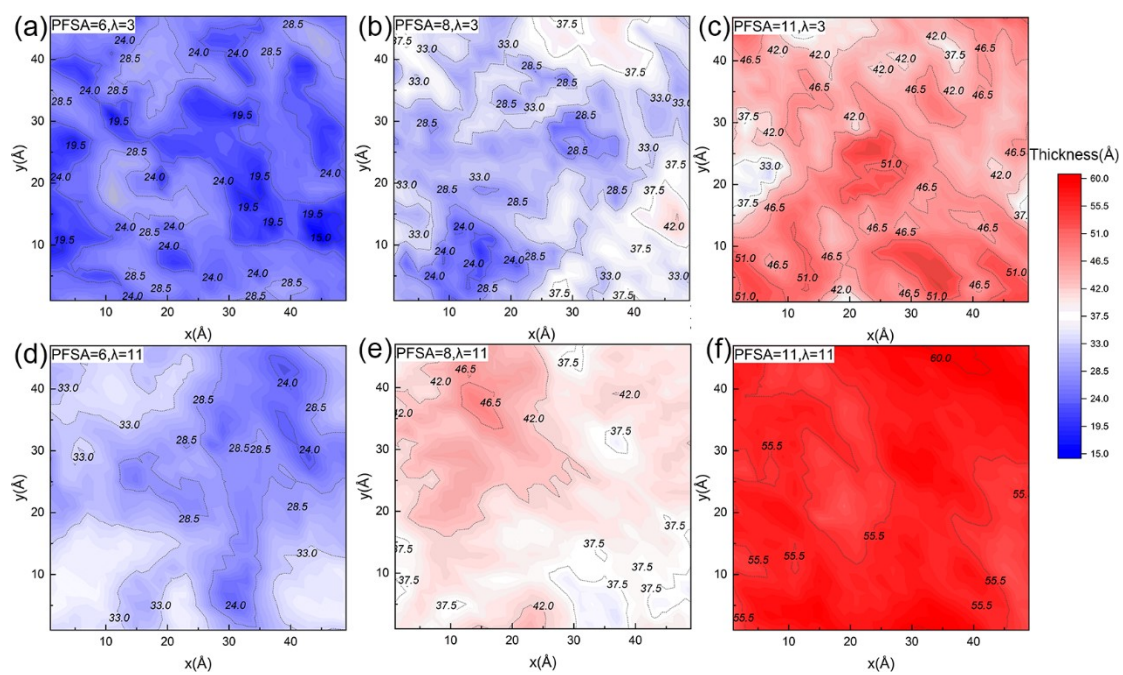

**Fig. S5.** The thickness distribution of ionomer film through the x-y planes.

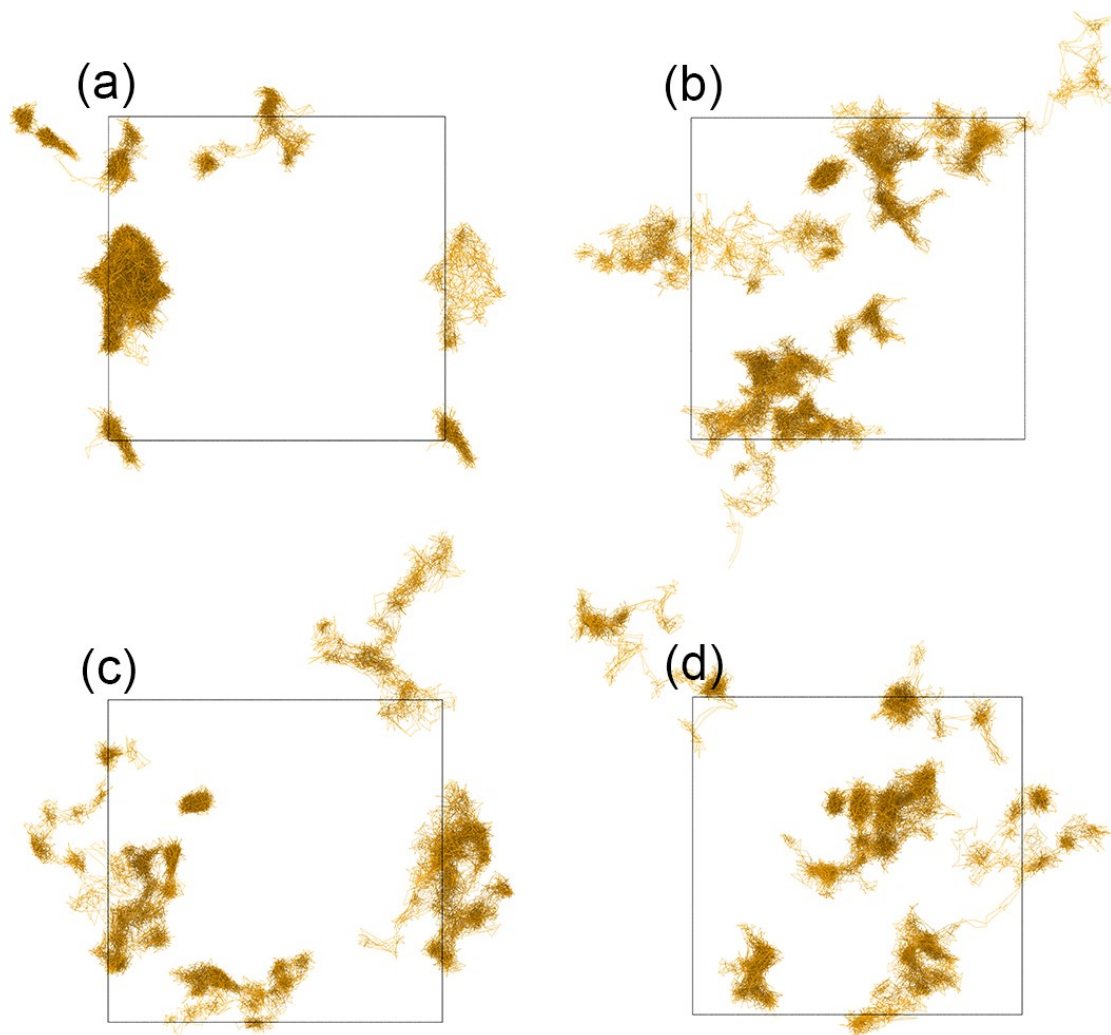

**Fig. S6.** Typical oxygen diffusion trajectories in ionomer film. (a) PFSA=6,  $\lambda=3$ ; (b) PFSA =11,  $\lambda=3$ ; (c) PFSA =6,  $\lambda=11$ ; (d) PFSA =11,  $\lambda=11$ .

## References:

- [1] Mabuchi, T.; Tokumasu, T. Effect of Bound State of Water on Hydronium Ion Mobility in Hydrated Nafion Using Molecular Dynamics Simulations. *J. Chem. Phys.* 2014, 141, 104904.
- [2] You, J.; Cheng, X.; Li, H.; Yin, J.; Yan, X.; Wei, G.; Shen, S.; Zhang, J. Innovative Insight into O<sub>2</sub>/N<sub>2</sub> Permeation Behavior through an Ionomer Film in Cathode Catalyst Layers of Polymer Electrolyte Membrane Fuel Cells. *J. Phy. Chem. Lett.* 2022, 13, 11444-11453.
- [3] Morris, D. R.; Sun, X. Water-Sorption and Transport Properties of Nafion 117 H. *J. Appl. Polym. Sci.* 1993, 50, 1445-1452.
- [4] Fan, L.; Xi, F.; Wang, X.; Xuan, J.; Jiao, K. Effects of Side Chain Length on the Structure, Oxygen Transport and Thermal Conductivity for Perfluorosulfonic Acid Membrane: Molecular Dynamics Simulation. *J. Electrochem. Soc.* 2019, 166, F511-F518.
- [5] Devanathan, R.; Venkatnathan, A.; Dupuis, M. Atomistic Simulation of Nafion Membrane: I. Effect of Hydration on Membrane Nanostructure. *J. Phys. Chem. B* 2007, 111, 8069-8079.
- [6] Venkatnathan, A.; Devanathan, R.; Dupuis, M. Atomistic Simulations of Hydrated Nafion and Temperature Effects on Hydronium Ion Mobility. *J. Phys. Chem. B* 2007, 111, 7234-7244.
- [7] Ban, S.; Huang, C.; Yuan, X.-Z.; Wang, H. Molecular Simulation of Gas Adsorption, Diffusion, and Permeation in Hydrated Nafion Membranes. *J. Phys. Chem. B* 2011, 115, 11352-11358.
- [8] Fan, L.; Wang, Y.; Jiao, K. Oxygen Transport Routes in Ionomer Film on Polyhedral Platinum Nanoparticles. *ACS Nano* 2020, 14, 17487-17495.
- [9] Fan, L.; Wang, Y.; Jiao, K. Oxygen Permeation Resistances and Routes in Nanoscale Ionomer Thin Film on Platinum Surface. *J. Electrochem. Soc.* 2021, 168, 014511.
- [10] Kurihara, Y.; Mabuchi, T.; Tokumasu, T. Molecular Analysis of Structural Effect of Ionomer on Oxygen Permeation Properties in PEFC. *J. Electrochem. Soc.* 2017, 164, F628-F637.
- [11] Kurihara, Y.; Mabuchi, T.; Tokumasu, T. Molecular Dynamics Study of Oxygen Transport Resistance through Ionomer Thin Film on Pt Surface. *J. Power Sources* 2019, 414, 263-271.
- [12] Kuo, A.-T.; Shinoda, W.; Okazaki, S. Molecular Dynamics Study of the Morphology of Hydrated Perfluorosulfonic Acid Polymer Membranes. *J. Phys. Chem. C* 2016, 120, 25832-25842.
- [13] Takeuchi, K.; Kuo, A.-T.; Hirai, T.; Miyajima, T.; Urata, S.; Terazono, S.; Okazaki, S.; Shinoda, W. Hydrogen Permeation in Hydrated Perfluorosulfonic Acid Polymer Membranes: Effect of Polymer Crystallinity and Equivalent Weight. *J. Phys. Chem. C* 2019, 123, 20628-20638.
- [14] Cui, R.; Li, S.; Yu, C.; Wang, Y.; Zhou, Y. Understanding the Mechanism of Nitrogen Transport in the Perfluorinated Sulfonic-Acid Hydrated Membranes via



Molecular Dynamics Simulations. *J. Membr. Sci.* 2022, 648, 120328.

[15] Cui, R.; Li, S.; Yu, C.; Zhou, Y. The Evolution of Hydrogen Bond Network in Nafion via Molecular Dynamics Simulation. *Macromolecules* 2023, 56, 1688-1703.
